# Supplementary material
Source: publisher site journal article supplement (https://www.spandidos-publications.com/8342/downloadSupplementary)
Supplement: Supplementary file 1 [file downloadSupplementary]

**Table SI.** Results of Spearman's correlation rank test.

| <b>Variable</b>         | <b>Age</b> | <b>TC</b> | <b>TG</b> | <b>LDL</b> | <b>UA</b> | <b>FCP</b> | <b>HbA1C</b> | <b>Disease duration</b> | <b>Random blood glucose levels</b> | <b>BUN</b> | <b>Cr</b> | <b>AST</b> | <b>ALT</b> |
|-------------------------|------------|-----------|-----------|------------|-----------|------------|--------------|-------------------------|------------------------------------|------------|-----------|------------|------------|
| Correlation coefficient | -0.258     | -0.067    | 0.124     | -0.081     | -0.278    | 0.065      | 0.056        | -0.263                  | 0.171                              | 0.236      | 0.283     | -0.011     | 0.051      |
| P-value                 | 0.141      | 0.708     | 0.485     | 0.648      | 0.112     | 0.715      | 0.753        | 0.132                   | 0.333                              | 0.18       | 0.105     | 0.953      | 0.775      |
| Sample size (n)         | 34         | 34        | 34        | 34         | 34        | 34         | 34           | 34                      | 34                                 | 34         | 34        | 34         | 34         |

TC, total cholesterol; TG, triglycerides; LDL, low-density lipoprotein; UA, uric acid; FCP, fasting C-peptide; HbA1c, hemoglobin A1c; BUN, blood urea nitrogen; Cr, creatinine; AST, aspartate aminotransferase; ALT, alanine aminotransferase.

**Table SII.** Results of Mann-Whitney U-test.

| <b>Variable</b> | <b>Sex</b> | <b>ICA</b> | <b>GADA</b> | <b>IAA</b> | <b>IA2A</b> |
|-----------------|------------|------------|-------------|------------|-------------|
| U-value         | 85         | 104        | 62          | 54         | 133         |
| P-value         | 0.127      | 0.408      | 0.61        | 0.748      | 0.901       |
| Sample uize (n) | 34         | 34         | 34          | 34         | 34          |
